# Supplementary material for: MicroRNA-16 feedback loop with p53 and Wip1 can regulate cell fate determination between apoptosis and senescence in DNA damage response
Source: PubMed Central journal article supplement (PMC5624635; doi:10.1371/journal.pone.0185794), 2017-10-02
Supplement: pone.0185794.s003.pdf [file pone.0185794.s003.pdf]

## Molecular Definition of Network Elements

| <b>Node</b> | <b>Description</b>                                                  |
|-------------|---------------------------------------------------------------------|
| S           | DNA damage: 0 (no damage), (1) reparable and (2) irreparable damage |
| ATR         | Ataxia telangiectasia and Rad3 related protein                      |
| ATM         | Ataxia telangiectasia mutated protein                               |
| miR16       | microRNA 16-1                                                       |
| p53         | Tumor suppressor p53 protein                                        |
| Mdm2        | E3 ubiquitin protein ligase homolog protein                         |
| Wip1        | Protein Phosphatase 1D                                              |
| p21         | Cyclin-dependent kinase inhibitor 1A protein                        |
| pRB         | Retinoblastoma 1 protein                                            |
| E2F1        | E2F1 transcription factor 1                                         |
| Cdk2cE      | Cyclin dependent kinase 2 / Cyclin E Complex                        |
| Cdc25       | Cell division cycle 25A protein                                     |
| Cdk46cD     | Cyclin dependent kinase 4 and 6 / Cyclin D Complex                  |
